# Supplementary material
Source: Springer Nature journal article supplement (https://www.springermedizin.de/resource/supplementary/12990_2008_172_MOESM1_ESM.pdf/9612720)

**A****Paw Diameter**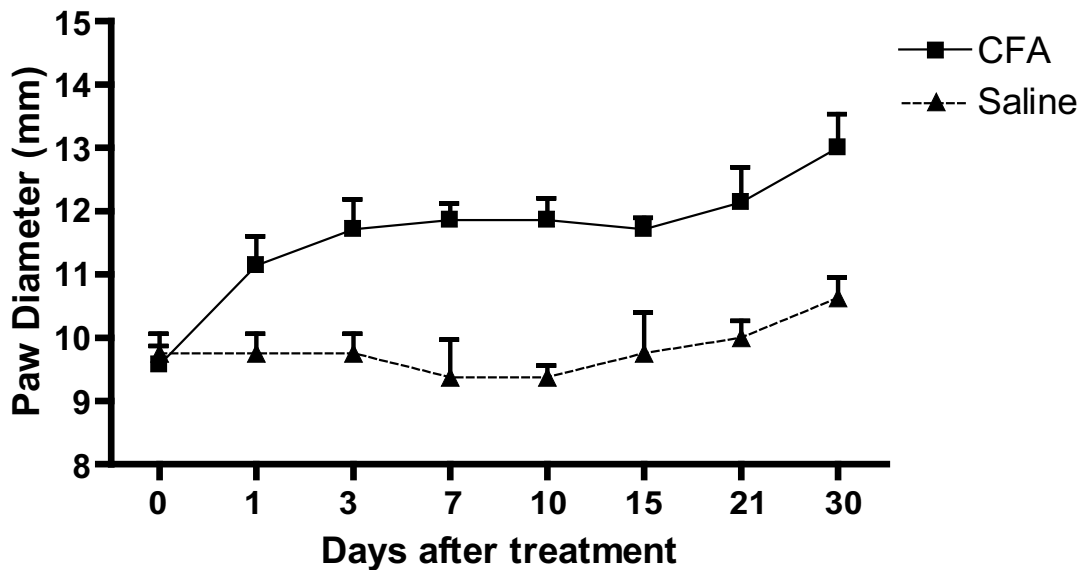**B****Paw Thickness**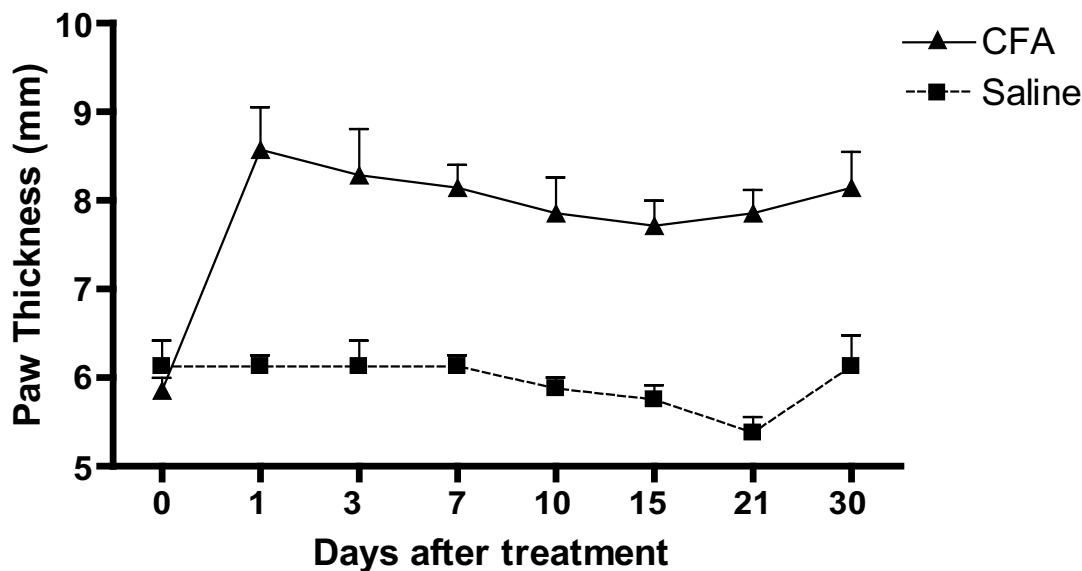

Supplement: MOESM1 [file 9612720]
